# Supplementary material for: Lifestyle and Horizontal Gene Transfer-Mediated Evolution of Mucispirillum schaedleri, a Core Member of the Murine Gut Microbiota
Source: PubMed Central journal article supplement (PMC5285517; doi:10.1128/msystems.00171-16), 2017-01-31
Supplement: sys001172082sf2.pdf [file sys001172082sf2.pdf]

**B**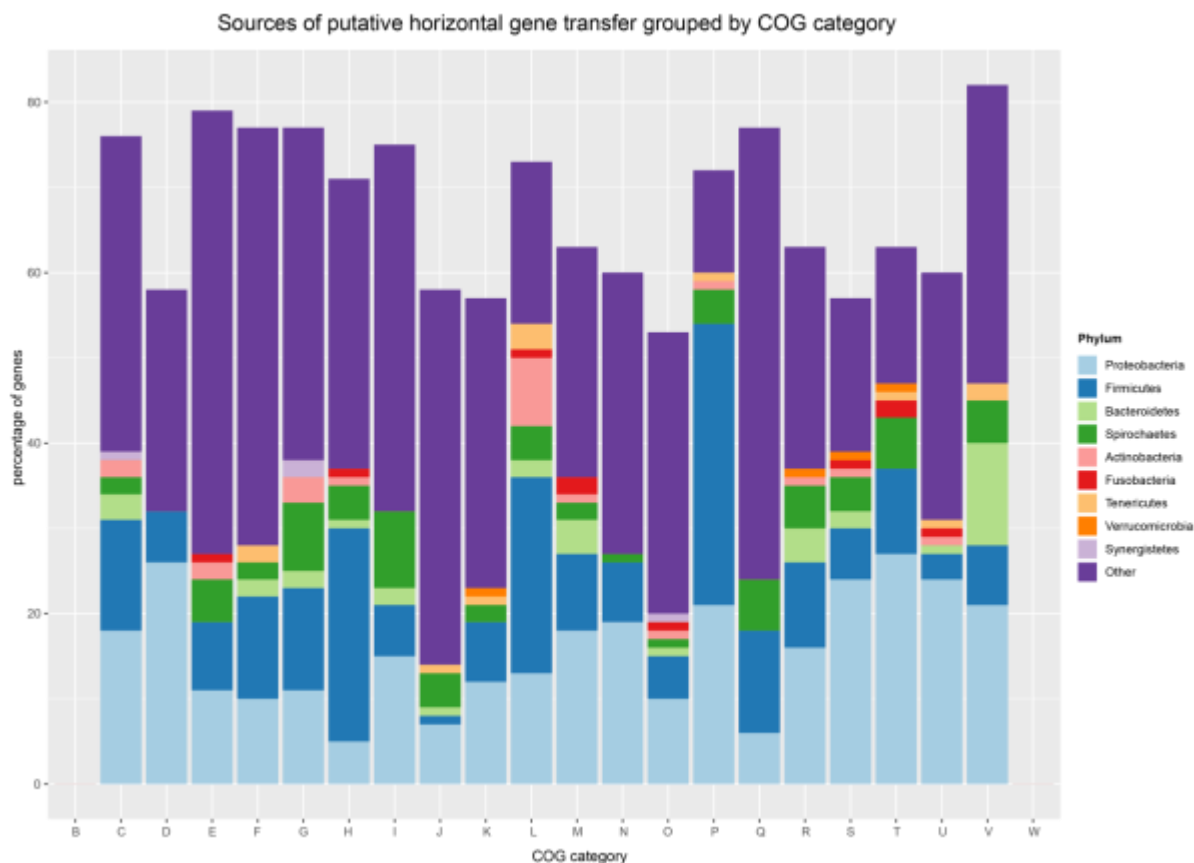

**Figure S1. Potential source phylum of putatively horizontally-transferred genes of *M. schaedleri* ASF 457 AYGZ grouped by Clusters of Orthologous Groups (COG) category.** (A) Number of genes and (B) relative abundance of genes are shown. “Other” denotes genes for which the potential source phylum is ambiguous or not listed. COG categories are: B: Chromatin Structure and dynamics, C: Energy production and conversion, D: Cell cycle control and mitosis, E: Amino Acid metabolism and transport, F: Nucleotide metabolism and transport, G: Carbohydrate metabolism and transport, H: Coenzyme metabolism, I: Lipid metabolism, J: Translation, K: Transcription, L: Replication and repair, M: Cell wall/membrane/envelop biogenesis, N: Cell motility, O: Post-translational modification, protein turnover, chaperone functions, P: Inorganic ion transport and metabolism, Q: Secondary Structure, R: General Functional Prediction only, S: Function Unknown T: Signal Transduction, U: Intracellular trafficking and secretion, and V: Defense mechanisms.
