# Supplementary material for: Lifestyle and Horizontal Gene Transfer-Mediated Evolution of Mucispirillum schaedleri, a Core Member of the Murine Gut Microbiota
Source: PubMed Central journal article supplement (PMC5285517; doi:10.1128/msystems.00171-16), 2017-01-31
Supplement: sys001172082sf3.pdf [file sys001172082sf3.pdf]

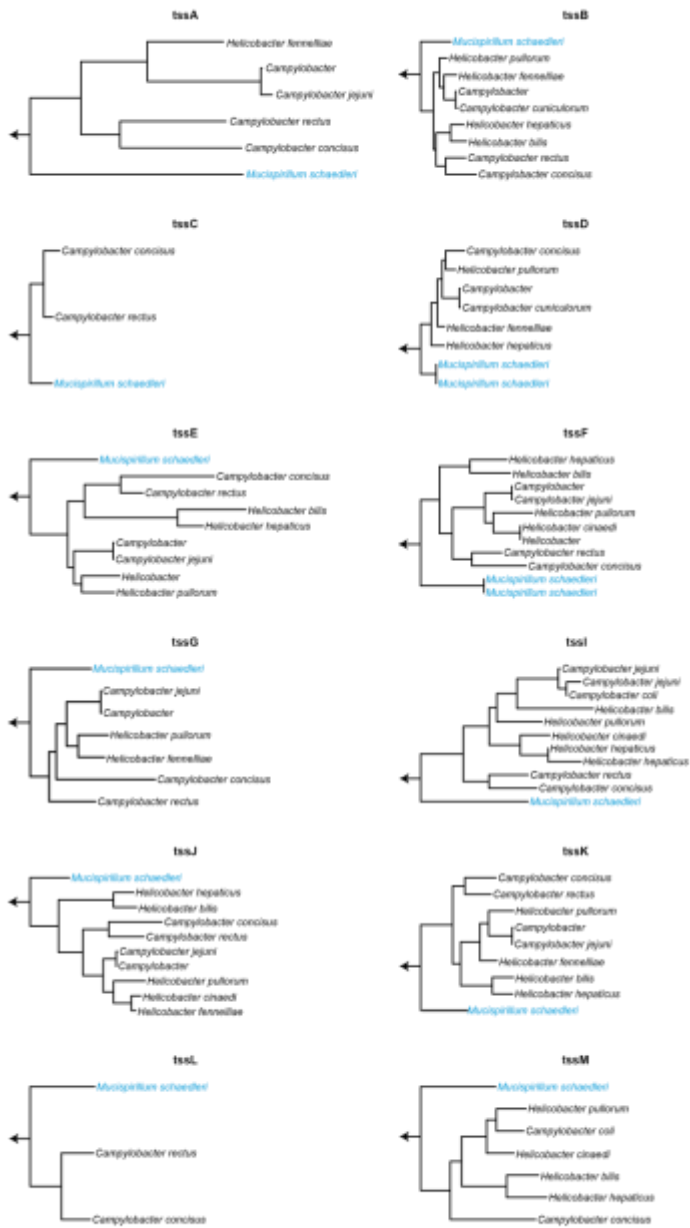

**Figure S2. Phylogenetic reconstruction of genes of the Type VI Secretion System (T6SS) of *M. schaedleri* ASF 457 AYGZ.** *M. schaedleri* is highlighted in blue. Multiple *M. schaedleri* tips indicate duplicated copies of the gene. The displayed sub-trees show the phylogenetically-closest group of organisms for each gene of the T6SS and arrows indicate outgroups.
