# Supplementary material for: Lifestyle and Horizontal Gene Transfer-Mediated Evolution of Mucispirillum schaedleri, a Core Member of the Murine Gut Microbiota
Source: PubMed Central journal article supplement (PMC5285517; doi:10.1128/msystems.00171-16), 2017-01-31
Supplement: sys001172082sf4.pdf [file sys001172082sf4.pdf]

A

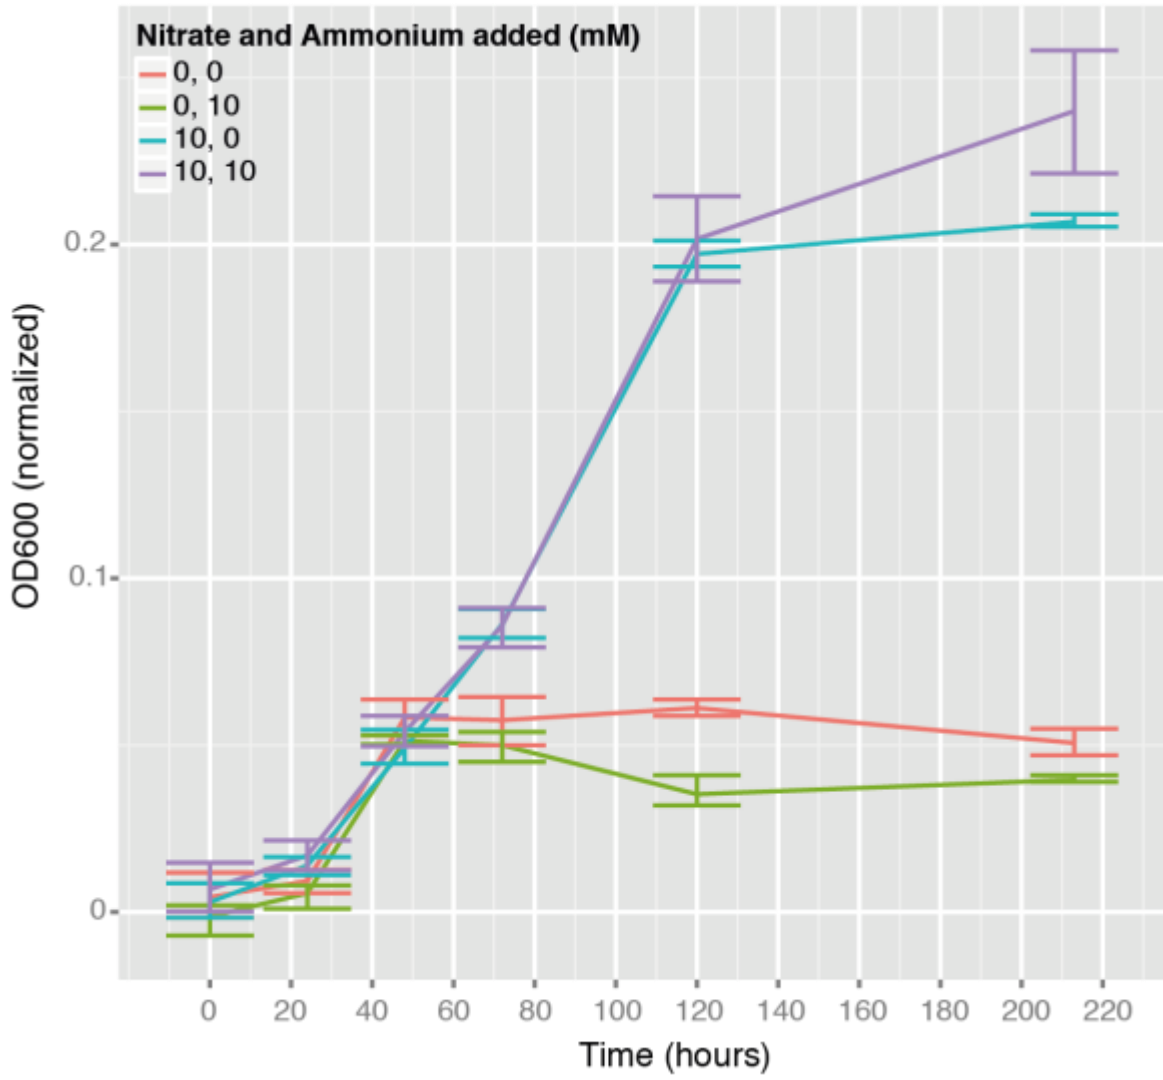

**B**

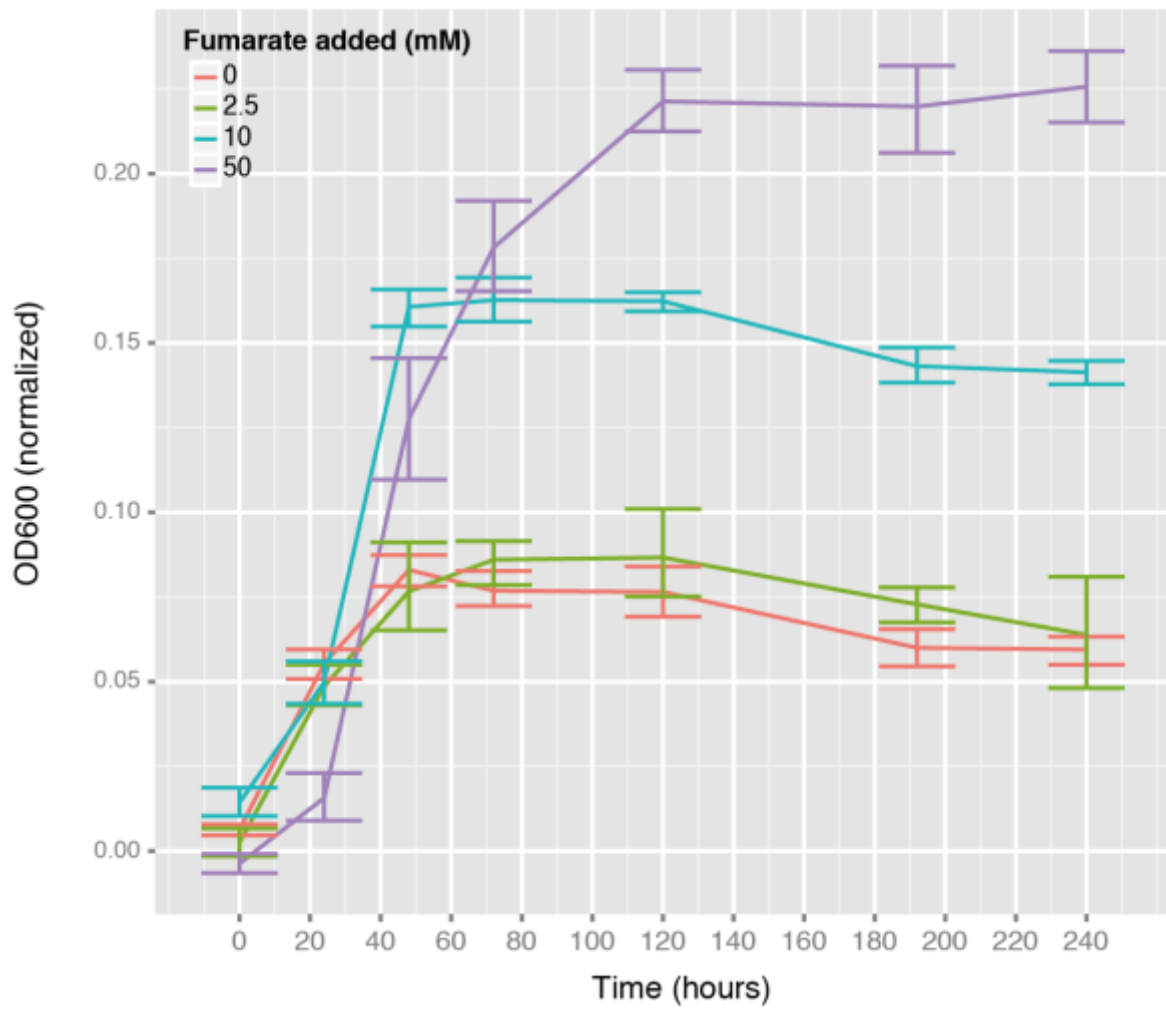

**Figure S3. Growth of *M. schaedleri* in the presence of (A) additional ammonium or (B) fumarate.** Growth was determined spectrophotometrically (at 600 nm) and was normalized by subtracting background absorbance from the medium. Mean and standard deviation of three replicate experiments is shown.
