# Supplementary material for: Lifestyle and Horizontal Gene Transfer-Mediated Evolution of Mucispirillum schaedleri, a Core Member of the Murine Gut Microbiota
Source: PubMed Central journal article supplement (PMC5285517; doi:10.1128/msystems.00171-16), 2017-01-31
Supplement: sys001172082sf5.pdf [file sys001172082sf5.pdf]

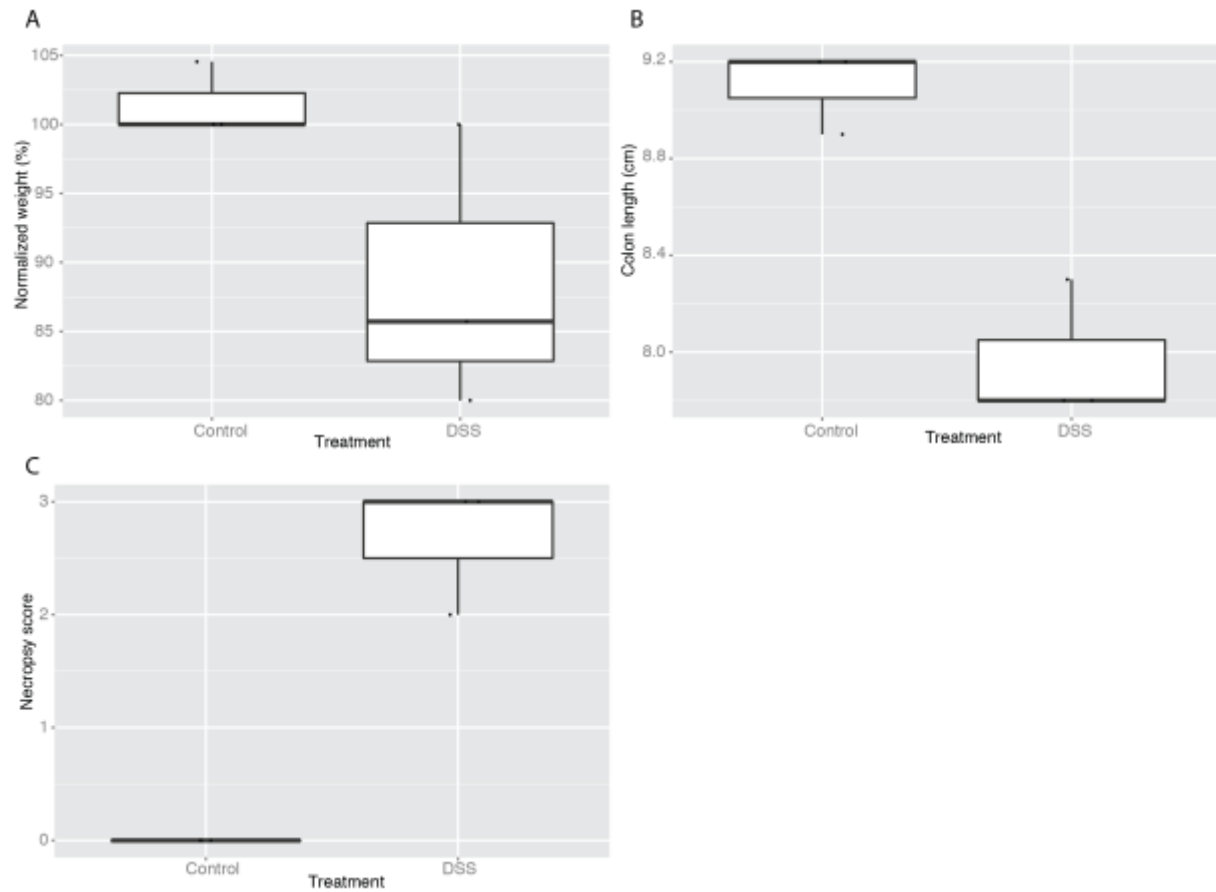

**Figure S4. Induction of acute colitis in the dextran sodium sulfate (DSS) mouse model.** Boxplots of (A) normalized body weight, (B) colon length, and (C) gross score at necropsy are shown. All parameters were significantly affected by DSS treatment ( $p < 0.05$  for each).
