# Supplementary material for: Lifestyle and Horizontal Gene Transfer-Mediated Evolution of Mucispirillum schaedleri, a Core Member of the Murine Gut Microbiota
Source: PubMed Central journal article supplement (PMC5285517; doi:10.1128/msystems.00171-16), 2017-01-31
Supplement: sys001172082st6.pdf [file sys001172082st6.pdf]

**Table S1. General features of the genomes of *Mucispirillum schaedleri* ASF 457 sub-strains AYGZ and MCS.**

|                                                        | <b>AYGZ</b>       | <b>MCS</b>        |
|--------------------------------------------------------|-------------------|-------------------|
| Total size (Mb)                                        | 2.3               | 2.3               |
| GC content                                             | 31.15%            | 31.16%            |
| Number of contigs                                      | 39                | 36                |
| Repeated Regions                                       | 10.54%            | 11.08%            |
| Average CDS length (bp)                                | 923.71            | 931.26            |
| Average intergenic length (bp)                         | 147.5             | 146.77            |
| Protein coding density                                 | 88.21%            | 87.94%            |
| # of genomic objects without artifacts                 | 2,285             | 2,271             |
| Total # of CDS                                         | 2,227             | 2,218             |
| Protein coding genes                                   | 2,223             | 2,214             |
| 5S / 16S / 23S rRNA                                    | 2 / 3 / 2         | 2 / 2 / 2         |
| tRNA                                                   | 39 (complete set) | 38 (complete set) |
| Housekeeping genes detected (estimate of completeness) | 31 (of 31)        | 31 (of 31)        |
