# Supplementary material for: Lifestyle and Horizontal Gene Transfer-Mediated Evolution of Mucispirillum schaedleri, a Core Member of the Murine Gut Microbiota
Source: PubMed Central journal article supplement (PMC5285517; doi:10.1128/msystems.00171-16), 2017-01-31
Supplement: sys001172082st8.pdf [file sys001172082st8.pdf]

**Table S3. Differentially-expressed genes of *M. schaedleri*.** (A) Differentially-expressed genes of *M. schaedleri* ASF 457 MCS between cecum and colon of ASF4 mice. (B) Differentially-expressed genes of *M. schaedleri* ASF 457 AYGZ during acute colitis ASF8 mice. The log<sub>2</sub>-transformed fold change (FC) is listed as well as the average log-transformed counts per million reads (logCPM). P-values were adjusted using the *fdr* method. The gene annotation is also listed.

**A**

| Gene        | FC<br>(colon vs. cecum) | logCPM | P-value | Annotation                                     |
|-------------|-------------------------|--------|---------|------------------------------------------------|
| MCSv2_30030 | 3.027                   | 9.217  | 0.002   | conserved exported protein of unknown function |
| MCSv2_30031 | 2.646                   | 8.932  | 0.004   | conserved exported protein of unknown function |
| MCSv2_30139 | 3.453                   | 6.478  | 0.019   | conserved protein of unknown function          |
| MCSv2_30174 | 1.898                   | 7.678  | 0.053   | conserved exported protein of unknown function |
| MCSv2_30192 | 1.964                   | 7.336  | 0.053   | conserved protein of unknown function          |

**B**

| Gene          | FC<br>(control vs. DSS) | logCPM | P-value | Annotation                                               |
|---------------|-------------------------|--------|---------|----------------------------------------------------------|
| AYGZv1_100007 | 3.036                   | 5.803  | 0.054   | protein of unknown function                              |
| AYGZv1_150075 | -6.703                  | 6.239  | 0.054   | Conjugal transfer protein TrbB                           |
| AYGZv1_150076 | -8.309                  | 7.567  | 0.002   | membrane protein of unknown function                     |
| AYGZv1_150077 | -7.619                  | 6.969  | 0.009   | Conjugal transfer protein TrbD                           |
| AYGZv1_150078 | -9.158                  | 8.320  | 0.001   | Type IV secretion/conjugal transfer ATPase, VirB4 family |
| AYGZv1_150080 | -6.921                  | 6.401  | 0.033   | Mating pair formation protein TrbG                       |
| AYGZv1_150082 | -7.130                  | 6.638  | 0.033   | protein of unknown function                              |
| AYGZv1_150083 | -9.036                  | 8.187  | 0.001   | exported protein of unknown function                     |
| AYGZv1_150086 | -4.161                  | 8.686  | 0.011   | protein of unknown function                              |
| AYGZv1_260003 | -4.350                  | 7.301  | 0.001   | 4Fe-4S ferredoxin iron-sulfur binding domain protein     |
| AYGZv1_260004 | -3.069                  | 8.148  | 0.009   | protein of unknown function                              |
| AYGZv1_tRNA31 | -2.981                  | 8.173  | 0.033   | Methionine tRNA                                          |
