# Supplementary material for: Lifestyle and Horizontal Gene Transfer-Mediated Evolution of Mucispirillum schaedleri, a Core Member of the Murine Gut Microbiota
Source: PubMed Central journal article supplement (PMC5285517; doi:10.1128/msystems.00171-16), 2017-01-31
Supplement: sys001172082st9.pdf [file sys001172082st9.pdf]

**Table S4. Differentially-expressed gene sets in the cecum of mice** colonized with *M. schaedleri* MCS. (A) Upregulated gene sets and (B) downregulated gene sets. All mice had an ASF<sup>4</sup> microbiota as a background (n=6 per group). Size indicates the number of genes in the gene set. Differential expression is quantified by normalized enrichment scores (NES) and statistical significance is determined using the *fdr*-corrected q-values.

**A**

| Gene set                                                                                                           | Size | NES   | FDR q-val |
|--------------------------------------------------------------------------------------------------------------------|------|-------|-----------|
| EUKARYOTIC.TRANSLATION.ELONGATION                                                                                  | 46   | 2.599 | 0.000     |
| PEPTIDE.CHAIN.ELONGATION                                                                                           | 42   | 2.591 | 0.000     |
| EUKARYOTIC.TRANSLATION.TERMINATION                                                                                 | 42   | 2.489 | 0.000     |
| FORMATION.OF.A.POOL.OF.FREE.40S.SUBUNITS                                                                           | 52   | 2.468 | 0.000     |
| L13A.MEDIATED.TRANSLATIONAL.SILENCING.OF.CERULOPLASMIN.EXPRESSION                                                  | 60   | 2.410 | 0.000     |
| NONSENSE.MEDIATED.DECAY.NMD.INDEPENDENT.OF.THE.EXON.JUNCTION.COMPLEX.EJC.                                          | 47   | 2.386 | 0.000     |
| KEGG_RIBOSOME                                                                                                      | 88   | 2.384 | 0.000     |
| X3.UTR.MEDIATED.TRANSLATIONAL.REGULATION                                                                           | 60   | 2.376 | 0.000     |
| VIRAL.MRNA.TRANSLATION                                                                                             | 45   | 2.351 | 0.000     |
| GTP.HYDROLYSIS.AND.JOINING.OF.THE.60S.RIBOSOMAL.SUBUNIT                                                            | 61   | 2.318 | 0.000     |
| SRP.DEPENDENT.COTRANSLATIONAL.PROTEIN.TARGETING.TO.MEMBRANE                                                        | 62   | 2.219 | 0.000     |
| EUKARYOTIC.TRANSLATION.INITIATION                                                                                  | 68   | 2.211 | 0.000     |
| CAP.DEPENDENT.TRANSLATION.INITIATION                                                                               | 68   | 2.202 | 0.000     |
| TRANSLATION                                                                                                        | 98   | 2.110 | 0.001     |
| RESPIRATORY.ELECTRON.TRANSPORT                                                                                     | 68   | 2.104 | 0.001     |
| TRANSLATION.INITIATION.COMPLEX.FORMATION                                                                           | 37   | 2.100 | 0.001     |
| FORMATION.OF.THE.TERNARY.COMPLEX.AND.SUBSEQUENTLY.THE.43S.COMPLEX                                                  | 31   | 2.060 | 0.001     |
| NONSENSE.MEDIATED.DECAY.NMD.ENHANCED.BY.THE.EXON.JUNCTION.COMPLEX.EJC.                                             | 64   | 2.059 | 0.001     |
| NONSENSE.MEDIATED.DECAY.NMD.                                                                                       | 64   | 2.045 | 0.001     |
| RIBOSOMAL.SCANNING.AND.START.CODON.RECOGNITION                                                                     | 37   | 2.040 | 0.001     |
| ACTIVATION.OF.THE.MRNA.UPON.BINDING.OF.THE.CAP.BINDING.COMPLEX.AND.EIFS.AND.SUBSEQUENT.BINDING.TO.43S              | 38   | 2.032 | 0.002     |
| WP163.CYTOPLASMIC.RIBOSOMAL.PROTEINS                                                                               | 56   | 2.021 | 0.002     |
| RESPIRATORY.ELECTRON.TRANSPORT.ATP.SYNTHESIS.BY.CHEMIOSMOTIC.COUPPLING.AND.HEAT.PRODUCTION.BY.UNCOUPLING.PROTEINS. | 82   | 1.947 | 0.005     |
| WP1248.OXIDATIVE.PHOSPHORYLATION                                                                                   | 47   | 1.929 | 0.007     |
| CHEMOKINE.RECEPTORS.BIND.CHEMOKINES                                                                                | 40   | 1.925 | 0.007     |
| THE.CITRIC.ACID.TCA.CYCLE.AND.RESPIRATORY.ELECTRON.TRANSPORT                                                       | 120  | 1.903 | 0.009     |
| KEGG_OXIDATIVE.PHOSPHORYLATION                                                                                     | 109  | 1.890 | 0.010     |

|                                                   |    |       |       |
|---------------------------------------------------|----|-------|-------|
| WP295.ELECTRON.TRANSPORT.CHAIN                    | 79 | 1.866 | 0.014 |
| MITOCHONDRIAL.TRANSLATION.TERMINATION             | 81 | 1.773 | 0.041 |
| INFLUENZA.VIRAL.RNA.TRANSCRIPTION.AND.REPLICATION | 84 | 1.764 | 0.045 |

## B

| Gene set                                                                              | Size | NES    | FDR q-val |
|---------------------------------------------------------------------------------------|------|--------|-----------|
| MITOTIC.PROMETAPHASE                                                                  | 104  | -2.779 | 0.000     |
| RESOLUTION.OF.SISTER.CHROMATID.COHESSION                                              | 96   | -2.759 | 0.000     |
| KEGG_COMPLEMENT.AND.COAGULATION.CASCADES                                              | 76   | -2.654 | 0.000     |
| WP449.COMPLEMENT.AND.COAGULATION.CASCADES                                             | 61   | -2.568 | 0.000     |
| WP1.STATIN.PATHWAY                                                                    | 19   | -2.483 | 0.000     |
| FORMATION.OF.FIBRIN.CLOT.CLOTTING.CASCADE.                                            | 36   | -2.397 | 0.000     |
| INTRINSIC.PATHWAY                                                                     | 23   | -2.278 | 0.000     |
| LIPOPROTEIN.METABOLISM                                                                | 27   | -2.300 | 0.000     |
| LIPID.DIGESTION.MOBILIZATION.AND.TRANSPORT                                            | 45   | -2.340 | 0.000     |
| COMMON.PATHWAY                                                                        | 17   | -2.389 | 0.000     |
| KINESINS                                                                              | 25   | -2.199 | 0.001     |
| BINDING.AND.UPTAKE.OF.LIGANDS.BY.SCAVENGER.RECEPTORS                                  | 36   | -2.163 | 0.002     |
| XENOBIOTICS                                                                           | 18   | -2.118 | 0.005     |
| WP190.CELL.CYCLE                                                                      | 84   | -2.103 | 0.005     |
| KEGG_RETINOL.METABOLISM                                                               | 80   | -2.105 | 0.005     |
| MITOTIC.M.M.G1.PHASES                                                                 | 280  | -2.084 | 0.005     |
| LOSS.OF.PROTEINS.REQUIRED.FOR.INTERPHASE.MICROTUBULE.ORGANIZATION.FROM.THE.CENTROSOME | 57   | -2.076 | 0.006     |
| WP460.BLOOD.CLOTTING.CASCADE                                                          | 20   | -2.064 | 0.006     |
| RECRUITMENT.OF.MITOTIC.CENTROSOME.PROTEINS.AND.COMPLEXES                              | 65   | -2.046 | 0.007     |
| LOSS.OF.NLP.FROM.MITOTIC.CENTROSOMES                                                  | 57   | -2.057 | 0.007     |
| COMPLEMENT.CASCADE                                                                    | 31   | -2.047 | 0.007     |
| CELL.CYCLE.MITOTIC                                                                    | 414  | -2.038 | 0.007     |
| BIOC_INTRINSICPATHWAY                                                                 | 22   | -2.028 | 0.008     |
| WP200.COMPLEMENT.ACTIVATION.CLASSICAL.PATHWAY                                         | 16   | -2.027 | 0.008     |
| CELL.CYCLE                                                                            | 484  | -2.018 | 0.009     |
| REV.MEDIATED.NUCLEAR.EXPORT.OF.HIV.RNA                                                | 29   | -2.008 | 0.009     |
| CENTROSOME.MATURATION                                                                 | 65   | -2.001 | 0.010     |
| M.PHASE                                                                               | 247  | -1.996 | 0.010     |
| REGULATION.OF.GLUCOKINASE.BY.GLUCOKINASE.REGULATORY.PROTEIN                           | 26   | -1.985 | 0.010     |
| TRANSPORT.OF.RIBONUCLEOPROTEINS.INTO.THE.HOST.NUCLEUS                                 | 28   | -1.991 | 0.010     |
| EXPORT.OF.VIRAL.RIBONUCLEOPROTEINS.FROM.NUCLEUS                                       | 30   | -1.985 | 0.011     |
| MITOTIC.METAPHASE.AND.ANAPHASE                                                        | 166  | -1.969 | 0.012     |
| AMINO.ACID.AND.OLIGOPEPTIDE.SLC.TRANSPORTERS                                          | 49   | -1.950 | 0.012     |
| ERK.MAPK.TARGETS                                                                      | 21   | -1.963 | 0.012     |

|                                                                       |     |        |       |
|-----------------------------------------------------------------------|-----|--------|-------|
| NUCLEAR.PORE.COMPLEX.NPC.DISASSEMBLY                                  | 29  | -1.951 | 0.013 |
| G2.M.TRANSITION                                                       | 102 | -1.951 | 0.013 |
| WP317.GLYCOGEN.METABOLISM                                             | 34  | -1.957 | 0.013 |
| SEPARATION.OF.SISTER.CHROMATIDS                                       | 154 | -1.952 | 0.013 |
| MITOTIC.ANAPHASE                                                      | 165 | -1.940 | 0.013 |
| INTERACTIONS.OF.REV.WITH.HOST.CELLULAR.PROTEINS                       | 31  | -1.935 | 0.014 |
| DEPOSITION.OF.NEW.CENPA.CONTAINING.NUCLEOSOMES.AT.THE.CENTROMERE      | 36  | -1.930 | 0.014 |
| TRANSPORT.OF.MATURE.MRNAS.DERIVED.FROM.INTRONLESS.TRANSCRIPTS         | 32  | -1.925 | 0.015 |
| NEP.NS2.INTERACTS.WITH.THE.CELLULAR.EXPORT.MACHINERY                  | 29  | -1.921 | 0.015 |
| NUCLEAR.ENVELOPE.BREAKDOWN                                            | 46  | -1.909 | 0.016 |
| NUCLEAR.IMPORT.OF.REV.PROTEIN                                         | 28  | -1.914 | 0.016 |
| FACTORS.INVOLVED.IN.MEGAKARYOCYTE.DEVELOPMENT.AND.PLATELET.PRODUCTION | 116 | -1.911 | 0.016 |
| NUCLEOSOME.ASSEMBLY                                                   | 36  | -1.904 | 0.016 |
| MITOTIC.G2.G2.M.PHASES                                                | 104 | -1.895 | 0.017 |
| PLATELET.DEGRANULATION                                                | 76  | -1.889 | 0.018 |
| TRANSPORT.OF.THE.SLBP.DEPENDANT.MATURE.MRNA                           | 29  | -1.883 | 0.018 |
| INITIAL.TRIGGERING.OF.COMPLEMENT                                      | 17  | -1.876 | 0.019 |
| TRANSPORT.OF.MATURE.MRNA.DERIVED.FROM.AN.INTRONLESS.TRANSCRIPT        | 31  | -1.868 | 0.020 |
| PPARA_TARGETS                                                         | 178 | -1.866 | 0.021 |
| RESPONSE.TO.ELEVATED.PLATELET.CYTOSOLIC.CA2.                          | 81  | -1.863 | 0.021 |
| TRANSPORT.OF.THE.SLBP.INDEPENDENT.MATURE.MRNA                         | 28  | -1.837 | 0.027 |
| FCERI.MEDIATED.CA.2.MOBILIZATION                                      | 25  | -1.820 | 0.029 |
| BUTYRATE.RESPONSE.FACTOR.1.BRF1.DESTABILIZES.MRNA                     | 17  | -1.821 | 0.030 |
| UNFOLDED.PROTEIN.RESPONSE.UPR.                                        | 76  | -1.815 | 0.030 |
| TRANSPORT.TO.THE.GOLGI.AND.SUBSEQUENT.MODIFICATION                    | 35  | -1.822 | 0.030 |
| IRE1ALPHA.ACTIVATES.CHAPERONES                                        | 46  | -1.816 | 0.030 |
| BIOC_ATRBRCAPATHWAY                                                   | 19  | -1.808 | 0.031 |
| SYNTHESIS.OF.PIPS.AT.THE.GOLGI.MEMBRANE                               | 17  | -1.808 | 0.031 |
| POST.TRANSLATIONAL.PROTEIN.MODIFICATION                               | 244 | -1.799 | 0.032 |
| ANTIVIRAL.MECHANISM.BY.IFN.STIMULATED.GENES                           | 58  | -1.802 | 0.032 |
| NUCLEAR.EVENTS.KINASE.AND.TRANSCRIPTION.FACTOR.ACTIVATION.            | 24  | -1.800 | 0.032 |
| CHYLOMICRON.MEDIATED.LIPID.TRANSPORT                                  | 16  | -1.794 | 0.033 |
| EXTRACELLULAR.MATRIX.ORGANIZATION                                     | 251 | -1.785 | 0.035 |
| KEGG_STEROID.HORMONE.BIOSYNTHESIS                                     | 80  | -1.776 | 0.037 |
| KEGG_PRION.DISEASES                                                   | 35  | -1.769 | 0.037 |
| ISG15.ANTIVIRAL.MECHANISM                                             | 58  | -1.771 | 0.038 |
| AMINO.ACID.TRANSPORT.ACROSS.THE.PLASMA.MEMBRANE                       | 31  | -1.769 | 0.038 |
| KEGG_PPAR.SIGNALING.PATHWAY                                           | 79  | -1.764 | 0.038 |

|                                                                                                   |     |        |       |
|---------------------------------------------------------------------------------------------------|-----|--------|-------|
| REGULATION.OF.COMPLEMENT.CASCADE                                                                  | 19  | -1.772 | 0.038 |
| RORA.ACTIVATES.CIRCADIAN.GENE.EXPRESSION                                                          | 24  | -1.764 | 0.038 |
| GLUCOSE.TRANSPORT                                                                                 | 36  | -1.759 | 0.039 |
| PRE.NOTCH.PROCESSING.IN.GOLGI                                                                     | 18  | -1.751 | 0.041 |
| WP2316.PPAR.SIGNALING.PATHWAY                                                                     | 78  | -1.753 | 0.041 |
| KEGG_AMPK.SIGNALING.PATHWAY                                                                       | 126 | -1.749 | 0.041 |
| PHASE.1.FUNCTIONALIZATION.OF.COMPOUNDS                                                            | 76  | -1.739 | 0.044 |
| REGULATION.OF.PLK1.ACTIVITY.AT.G2.M.TRANSITION                                                    | 70  | -1.735 | 0.044 |
| O.GLYCOSYLATION.OF.TSR.DOMAIN.CONTAINING.PROTEINS                                                 | 39  | -1.736 | 0.045 |
| VPR.MEDIATED.NUCLEAR.IMPORT.OF.PICS                                                               | 28  | -1.719 | 0.050 |
| INTERACTIONS.OF.VPR.WITH.HOST.CELLULAR.PROTEINS                                                   | 29  | -1.715 | 0.050 |
| REGULATION.OF.LIPID.METABOLISM.BY.PEROXISOME.PROLIFERATOR.AC<br>TIVATED.RECEPTOR.ALPHA.PPARALPHA. | 114 | -1.716 | 0.051 |
| PI.METABOLISM                                                                                     | 50  | -1.709 | 0.052 |
