# Supplementary material for: Lifestyle and Horizontal Gene Transfer-Mediated Evolution of Mucispirillum schaedleri, a Core Member of the Murine Gut Microbiota
Source: PubMed Central journal article supplement (PMC5285517; doi:10.1128/msystems.00171-16), 2017-01-31
Supplement: sys001172082st10.pdf [file sys001172082st10.pdf]

**Table S5. Predicted factors responsible for the regulation of the differentially expressed genes in mice colonized with *M. schaedleri* MCS.** All mice had an ASF<sup>4</sup> microbiota as a background (n=6 per group). The differential expression levels of the listed target genes were used to predict whether an upstream regulator was activated or inhibited. The differential expression of the predicted upstream regulator is shown (Exp. Fold Change). Activation z-score and the associated p-value are based on a null model of no association based on random permutation of expression levels.

| Upstream Regulator | Exp. Fold Change | Molecule Type                     | Predicted State | Activation z-score | p-value  | Target genes in dataset                                                                    |
|--------------------|------------------|-----------------------------------|-----------------|--------------------|----------|--------------------------------------------------------------------------------------------|
| RELA               | -1.075           | transcription regulator           | Activated       | 2.581              | 2.78E-02 | ANKRD1,BNIP3L,CCL11,ELN,FOS,Madcam1,TLR2,TRAF1                                             |
| NFkB (complex)     |                  | complex                           | Activated       | 2.566              | 2.17E-04 | ANKRD1,CCL11,CLU,Cxcl9,DBP,FOS,FST,IFNA4,Madcam1,NR1D1,PIM3,SLC22A4,TFRC,TLR2,TRAF1,VPREB1 |
| tamoxifen          |                  | chemical drug                     | Activated       | 2.387              | 1.15E-02 | CLU,CYP2E1,FASN,FOS,OXTR,SCD,Scd2                                                          |
| poly rI:rC-RNA     |                  | biologic drug                     | Activated       | 2.285              | 2.65E-03 | CCL11,Cxcl9,FOS,IFNA4,Ins1,LPL,NFIL3,PIM3,TLR2,TRAF1,TSHR                                  |
| PPARD              | 1.030            | ligand-dependent nuclear receptor | Activated       | 2.236              | 3.14E-02 | FASN,LPL,PER3,SCD,Tlr12                                                                    |
| arachidonic acid   |                  | chemical - endogenous mammalian   | Activated       | 2.227              | 1.73E-03 | CLU,FASN,FOS,SCD,THRSP                                                                     |
| CYB5R4             | 1.056            | enzyme                            | Activated       | 2.219              | 1.05E-06 | FASN,Ins1,LPL,SCD,Scd2                                                                     |
| beta-carotene      |                  | chemical - endogenous mammalian   | Activated       | 2.219              | 2.58E-05 | LPL,ME1,NPR3,Orm1 (includes others),Scd2                                                   |
| hyaluronic acid    |                  | chemical - endogenous mammalian   | Activated       | 2.183              | 3.52E-03 | Cxcl9,FOS,FST,HMMR,TLR2                                                                    |
| HOXA10             | 1.029            | transcription regulator           | Activated       | 2.111              | 1.28E-06 | ALAS2,CA3,CYP2E1,DBP,FST,GSTA3,HLF,ME1,SCD,Scd2,THRSP                                      |
| POR                | -1.021           | enzyme                            | Activated       | 2                  | 7.99E-03 | EREG,GSTA3,HLF,LPL,SCD,Scd2                                                                |
| EGF                | 1.048            | growth factor                     | Inhibited       | -2.016             | 2.47E-04 | CLU,EREG,FASN,FOS,FST,Ins1,KRT16,MNX1,PBK,REN,SCD,Scd2,SERPINA1,ST3GAL3                    |

|               |        |                                   |           |        |          |                                                                                         |
|---------------|--------|-----------------------------------|-----------|--------|----------|-----------------------------------------------------------------------------------------|
| rosiglitazone |        | chemical drug                     | Inhibited | -2.051 | 2.05E-04 | CCL11,Cxcl9,FASN,FOS,HP,KLB,LPL,NR1D1,PC,RARB,REN,SCD,TSHR                              |
| PD98059       |        | chemical - kinase inhibitor       | Inhibited | -2.18  | 2.05E-05 | ANKRD1,CCL11,CLU,DSG1,ELN,FASN,FOS,Ins1,LPL,PC,REN,SEC14L2,SERPINA1,TF,TLR2,TNNI1,TRAF1 |
| THRB          | 1.004  | ligand-dependent nuclear receptor | Inhibited | -2.216 | 9.30E-03 | FASN,FOS,LPL,ME1,THRSP,TSHR                                                             |
| IGF1          | -1.072 | growth factor                     | Inhibited | -2.328 | 3.14E-05 | CLU,EDN2,ELN,FASN,FOS,HBB,Ins1,LPL,PBK,RARB,SCD,TF,THRSP,TSHR                           |
| Insulin       |        | group                             | Inhibited | -2.358 | 3.90E-04 | CA3,FASN,FOS,LPL,ME1,NFIL3,SCD,Scd2,THRSP,TLR2,TSHR                                     |
| RXRA          | 1.073  | ligand-dependent nuclear receptor | Inhibited | -2.369 | 8.75E-04 | FASN,FOS,LPL,NR1D1,Or m1 (includes others),PC,RARB,REN,SCD                              |
